# Supplementary material for: Global hydrobelts and hydroregions: improved reporting scale for water-related issues?
Source: Copernicus journal article supplement (doi:10.5194/hess-17-1093-2013), 2013-03-13
Supplement: Supplementary file 1 [file supplement_meybeck_et_al_revised.pdf › supplement_meybeck_et_al_revised.pdf]

## Supplementary information

*Meybeck et al: Global hydrobelts and hydroregions: improved reporting scale for water-related issues?*

The following section provides supplementary information for the Section 4.2 in the main article.

**Boreal hydroregions**, still barely populated, are characterized by a very low a population density: from 0.8 p km<sup>-2</sup> in North America, 4.7 p km<sup>-2</sup> in Europe, 5.8 p km<sup>-2</sup> in West Siberia, to 8.5 p km<sup>-2</sup> in East Siberia. The relative pressure RPI is 1.00 for N. America (by definition of the indicator), 3.6 for Europe, 8 for West Siberia and 11 for East Siberia, an illustration of their different exposures to potential water quality degradation.

Rural population is very sparse in these regions and these differences are probably linked to cities, generally established far away from the Arctic coastal zone, too cold, unlike in all other hydroregions. As agriculture is very limited, Human impacts are mostly due to large urban centres, to mining operations and to reservoir construction for hydropower as in the James Bay (Canada), N. Sweden, Ob and Yenissei River basins in W. Siberia. Influence on river regimes can therefore be locally very high (Nilsson *et al.*, 2005; Vörösmarty *et al.*, 2010). Boreal basins are very exposed to long range atmospheric pollutants originating from the Northern Mid Latitude Belt, much more industrialised (Eisenreich *et al.*, 1981). They are very sensitive to Global Warming (ACIA, 2006).

**Northern Mid Latitude hydroregions** are also contrasted for their human population. In Europe and Asia, where Human settlement has started very early (McNeill and McNeill, 2003; Klein Goldewijk *et al.*, 2010), they support very high population densities, 90 and 281 p km<sup>-2</sup>, respectively, in contrast to North America, 39.6 p km<sup>-2</sup>. Relative pressure indicators are

among the world's highest and range from 32 for the N. American region, 100 for the European hydroregion, to 180 for the Asian hydroregion.

Intensive agriculture and industrial production are characteristic of Europe and North America regions and are fast-developing in Asia. This has often resulted in marked degradation of river water quality with various trajectories, depending on issues (Meybeck, 2003; Billen and Garnier, 2007; Seitzinger *et al.*, 2010). Multiple water demands for hydropower, irrigated agriculture, industrialisation and urbanisation, have also resulted in the construction of cascading reservoirs on many rivers and of countless ( $n=10^8$ ) reservoirs in North America and Asia, securing the water resources (Vörösmarty, 2005) yet altering hydrological regimes and aquatic biodiversity (Nilsson *et al.*, 2005).

**Northern Dry regions** have medium population densities, unexpected when considering their very limited water resources: 27.2 p km<sup>-2</sup> for North America, 27.6 p km<sup>-2</sup> for Africa, 33.7 p km<sup>-2</sup> for Middle East and only 13.3 p km<sup>-2</sup> for Central Asia. The relative pressure indicator reaches its maximum for these regions: 220 for North Africa Dry region, 180 for North American Dry region, 269 for Middle East and 103 for Central Asia. These figures are averages that include the arid part of river basins in which population density is orders of magnitude lower; if corrected the RPI indicators on their parts of river basins would be much higher.

These regions are facing multiple and critical water quality and quantity issues as well documented for Central Asia by Dukhovny and De Schutter (2011): (i) populations in allogenic river basins essentially depend on upstream supply for their water resources (Viviroli *et al.*, 2007), placing them in a very fragile position, particularly when headwaters are managed or shared by different political or administrative entities. This is the case for the Colorado and the Rio Grande - Rio Bravo, for the Senegal, Nile, Jordan, Shatt el Arab, Indus, Amu Darya and Syr Darya rivers; (ii) their water quality is very sensitive to Human pressures, due to their lowest dilution power, particularly at low flows. This point is often underestimated when dry and wet basins are mixed in national or regional reporting; (iii) river water can be heavily used,

through withdrawal and/or diversions, particularly for irrigated agriculture and/or fast growing cities. As a result, some of the largest exorheic rivers of the Dry belt are now barely flowing to the ocean, a state termed neo-arheism (Meybeck, 2003), illustrating their extreme sensitivity to climate and anthropogenic changes. Examples are the Colorado, Rio Grande, Nile, Orange, in the Dry belt, and the Yellow River, Indus, Orange, Murray in other belts. Potential impacts of point sources of pollution on these rivers, as big cities (e.g. Cairo, Khartoum, New Delhi, Baghdad) are amplified by extreme seasonal variations with maximum local water quality degradation reached during low flows.

**Northern Subtropical regions** are characterized by their higher population density, maximum for Asia ( $194 \text{ p km}^{-2}$ ), high for North and Central America ( $103 \text{ p km}^{-2}$ ), and medium for Africa ( $55 \text{ p km}^{-2}$ ). However, the relative pressure indicator is limited for these regions due to their medium runoff: 93 for Africa and 90 for Asia, 66 for North and Central America. Depending on the water and energy demands, these rivers can also be equipped with dams and reservoirs as in India (Godavari, Narmada), Southeast Asia (Mekong, Chao Phraya, Song Koi) (Gupta, 2005), and Northern Africa (Niger). Impacts of point sources of pollution on these rivers also present seasonal variations, which may be locally very high (East Deccan, Middle Niger basin). In Southeast Asia accelerated land erosion due to land use changes is critical in many river basins. In terms of sediment transport to the ocean, this is often counterbalanced by the retention in reservoirs (Gupta, 2005; Salomons *et al.*, 2005).

**Equatorial regions** present the maximum contrast in terms of population densities. The South America Equatorial hydregion is one of the least populated ones in the world with only  $10.9 \text{ p km}^{-2}$  (Magdalena, Orinoco and Amazon basins). The African one is twice lower than the world's average ( $24.1 \text{ p km}^{-2}$  compared to  $49.6 \text{ p km}^{-2}$ ) and the Asian one is three times higher ( $141.2 \text{ p km}^{-2}$ ) with peaks exceeding  $900 \text{ p km}^{-2}$  in Java. Due to the very high runoff in this belt, the relative pressure indicator is limited in South-Asia (28.3),

very low in South America (2.85) and low in Africa (14.6), comparable to those of the Boreal regions.

Human impacts are limited to major cities, alleviated by a maximum dilution of their waste waters by large rivers (e.g. Manaus on the Rio Negro, Kinshasa on the Congo river). Based on the population criteria only, these rivers can be considered as in a sub-pristine state, but mining areas can have a marked local impact as in New Guinea or in the Congo basin. The occurrence of reservoirs in the Orinoco, Amazon and Congo rivers, for the energy supply of cities or industries, sometimes located in other basins, is still limited to few tributaries although this issue evolves rapidly. Deforestation is probably the major present threat on Equatorial regions, already affecting many basins in Southeast Asia, in Sumatra and Borneo, and in some parts of the Congo and of the Amazon basins (e.g. Rondonia).

**The Southern Subtropical regions** have limited population densities in South America ( $33.4 \text{ p km}^{-2}$ ) and in Africa ( $31.6 \text{ p km}^{-2}$ ), in contrast to North Australia where it reaches the world's minimum ( $0.7 \text{ p km}^{-2}$ ), similar to the North American Boreal region). The relative pressure is extremely low in Australia (1.24) and medium in South America (40) and in Africa (34.7), i.e. two to three times lower than in the Northern Subtropics. Deforestation and land use change and reservoir impacts (Parana, Zambezi) are among the issues reported in this region.

**The Southern Dry regions** have much lower population densities than their northern analogues:  $12.1 \text{ p km}^{-2}$  in South America,  $7.4 \text{ p km}^{-2}$  in Africa, and only  $0.8 \text{ p km}^{-2}$  for Australia. The relative pressure is medium for South America (30) and for Australia (37) and very high in Southern Africa (115) where past and present mining is a key issue for water quality.

**The Southern Mid-Latitude regions** have a limited extent, from 0.4 to  $1.9 \text{ M km}^2$ . They have low ( $12.7 \text{ p km}^{-2}$  in Australia) to medium densities ( $39.1$  for South America and  $48.3 \text{ p km}^{-2}$  for Africa). The relative pressure in African SML is very high (241), a figure only found in the Northern Dry regions; in South America and in Australia it is at levels comparable to other Southern

regions, 23.6 and 18.9 respectively. In these hydroregions human impacts are very variable: few South Chile rivers are probably the most pristine rivers of both North and South temperate zones, but some are under threat as of hydropower dams are constructed for far away mining areas. In contrast, the salinization issue in the Murray–Darling basin, due to complex natural causes and water use for agriculture, is observed since several decades (Chartres *et al.*, 2003). Both examples illustrate that population cannot be the only indicator of human pressure on river quality.

## References

- ACIA: The Arctic Climate Impact Assessment: Impacts of a Warming Arctic, Cambridge University Press. Available at: <http://www.acia.uaf.edu/pages/scientific.html>, 2006.
- Billen, G., and Garnier, J.: River basin nutrient delivery to the coastal sea: Assessing its potential to sustain new production of non-siliceous algae, *Marine Chemistry*, 106, 148-160, 10.1016/j.marchem.2006.12.017, 2007.
- Chartres, C., Stauffacher, M., Walker, G., and Hatton, T.: Is the River Murray Water Quality Deteriorating? A Salinity Perspective, CSIRO Land and Water, Canberra, 12, 2003.
- Dukhovny, V. A., and De Schutter, J.: Water in Central Asia: Past, Present and Future, CRC Press Inc, 432 pp., 2011.
- Eisenreich, S. J., Looney, B. B., and Thornton, J. D.: Airborne organic contaminants in the Great Lakes ecosystem, *Environmental Science & Technology*, 15, 30-38, 10.1021/es00083a002, 1981.
- Gupta, A.: Accelerated erosion and sedimentation in Southeast Asia, in: *The Physical Geography of Southeast Asia*, edited by: Gupta, A., Oxford University Press, 237-249, 2005.
- Klein Goldewijk, K., Beusen, A., and Janssen, P.: Long-term dynamic modeling of global population and built-up area in a spatially explicit way: HYDE 3.1, *The Holocene*, 20, 565-573, 2010.
- McNeill, J. R., and McNeill, W. H.: *The Human Web: A Bird's-Eye View of World History*, W. W. Norton & Company, 368 pp., 2003.
- Meybeck, M.: Global analysis of river systems: from earth system controls to Anthropocene controls, *Phil. Trans. Royal Acad. London B*, 358, 1935-1955, 2003.
- Nilsson, C., Reidy, C. A., Dynesius, M., and Revenga, C.: Fragmentation and flow regulation of the world's large river systems, *Science*, 308, 405-408, 2005.
- Salomons, W., Kremer, H., and Turner, K.: The catchment to coast continuum, in: *Coastal fluxes in the Anthropocene*, edited by: Crossland, C. J., Kremer, H. H., Lindeboom, H. J., Marshall Crossland, J. J., and Le Tissier, M. D. A., Springer, 145-200, 2005.
- Seitzinger, S. P., Mayorga, E., Bouwman, A. F., Kroeze, C., Beusen, A. H. W., Billen, G., Drecht, G. V., Dumont, E., Fekete, B. M., Garnier, J., and Harrison, J. A.: Global river nutrient export: A scenario analysis of past and future trends, *Global Biogeochemical Cycles*, 24 GB0A08, 10.1029/2009GB003587, 2010.

Viviroli, D., Dürr, H. H., Messerli, B., Meybeck, M., and Weingartner, R.: Mountains of the world – water towers for humanity: typology, mapping and global significance, *Water Resources Research*, 43, W07447, 10.1029/2006WR005653, 2007.

Vörösmarty, C. J., McIntyre, P. B., Gessner, M. O., Dudgeon, D., Prusevich, A., Green, P., Glidden, S., Bunn, S. E., Sullivan, C. A., Liermann, C. R., and Davies, P. M.: Global threats to human water security and river biodiversity, *Nature*, 467, 555-561, 10.1038/nature09440, 2010.

## SUPPLEMENT: COSCAT LIST

|        |      |   |     |    |         |            |        |        |        |       |               |       |       |               |                                                                                            |                            |                   |
|--------|------|---|-----|----|---------|------------|--------|--------|--------|-------|---------------|-------|-------|---------------|--------------------------------------------------------------------------------------------|----------------------------|-------------------|
| 1,3    | 1    | 3 | NDR | 43 | NDR_Ai  | 255,465    | -      | -      | -      | 149   | 462           | 85    | 122,8 | 31,360,760    | Moulouya, Chelif, Medjerda                                                                 | Mediterranean Sea          | Mediterranean Sea |
| 2,3    | 4    | 3 | NDR | 43 | NDR_Ai  | 2,259,983  | -      | -      | -      | 20,6  | 55            | 0     | 11,0  | 24,883,404    | Inharhar, Anaye                                                                            | Mediterranean Sea          | Mediterranean Sea |
| 3      | 3    | 3 | NDR | 43 | NDR_Ai  | 4,520,618  | -      | -      | -      | 45,6  | 216           | 170   | 45,5  | 216,170,582   | Nahr, Oudaba                                                                               | Mediterranean Sea          | Mediterranean Sea |
| 4,3    | 4    | 3 | NDR | 43 | NDR_Ai  | 331,544    | -      | -      | -      | 24,6  | 201           | 14    | 24,6  | 8,126,126     | No important rivers                                                                        | Red Sea                    | Indian Ocean      |
| 5,3    | 5    | 3 | NDR | 43 | NDR_Ai  | 97,463     | -      | -      | -      | 17,8  | 174,040       | 0     | 17,8  | 174,040       | No important rivers                                                                        | West Indian Ocean          | Indian Ocean      |
| 6,3    | 6    | 3 | NDR | 43 | NDR_Ai  | 1,347,196  | -      | -      | -      | 24,7  | 408           | 14    | 20,9  | 28,152,005    | Jadiba, Tana (Kenya)                                                                       | West Indian Ocean          | Indian Ocean      |
| 7,6    | 7    | 6 | SST | 46 | SST_Ai  | 846,942    | -      | -      | -      | 22,3  | 671           | 189   | 40,4  | 34,218,516    | Rufy, Rovuma, Galana, Pangani, Lurio, Wami                                                 | West Indian Ocean          | Indian Ocean      |
| 8,6    | 8    | 6 | SST | 46 | SST_Ai  | 166,331    | -      | -      | -      | 23,3  | 523           | 264   | 30,0  | 4,984,775     | Sofia                                                                                      | West Indian Ocean          | Indian Ocean      |
| 9,6    | 9    | 6 | SST | 46 | SST_Ai  | 256,344    | -      | -      | -      | 20,8  | 1,792         | 1,027 | 46,2  | 8,498,040     | Mandara                                                                                    | West Indian Ocean          | Indian Ocean      |
| 10,6   | 10   | 6 | SST | 46 | SST_Ai  | 236,344    | -      | -      | -      | 20,2  | 1,765,778     | 1,027 | 46,2  | 8,498,040     | Mandara                                                                                    | West Indian Ocean          | Indian Ocean      |
| 11,6   | 11   | 6 | SST | 46 | SST_Ai  | 17,526,622 | -      | -      | -      | 21,0  | 9,63          | 231   | 27,3  | 47,222,613    | Zambezi, Save, Pungue, Limpopo, Buzi                                                       | West Indian Ocean          | Indian Ocean      |
| 12,6   | 12   | 6 | SST | 46 | SST_Ai  | 485,786    | -      | -      | -      | 20,1  | 572           | 34    | 47,2  | 22,530,102    | Limpopo, Incomati                                                                          | West Indian Ocean          | Indian Ocean      |
| 13,6   | 13   | 6 | SML | 48 | SML_Ai  | 387,096    | -      | -      | -      | 14,3  | 17,786,074    | 0     | 14,3  | 17,786,074    | Qourin, Gantooen, Great Fish, Great Kei                                                    | West Indian Ocean          | Indian Ocean      |
| 13,7   | 13   | 7 | SDR | 47 | SDR_Ai  | 1,262,169  | -      | -      | -      | 17,2  | 304           | 9     | 10,4  | 13,418,724    | Orange, Oflanta                                                                            | South East Atlantic Ocean  | Atlantic Ocean    |
| 14,9   | 14   | 9 | SDT | 45 | SDT_Ai  | 3,642,884  | -      | -      | -      | 23,0  | 1,529         | 349   | 20,3  | 77,841,408    | Zaire, Koukou                                                                              | South East Atlantic Ocean  | Atlantic Ocean    |
| 15,9   | 15   | 9 | SDT | 45 | SDT_Ai  | 510,841,6  | -      | -      | -      | 20,9  | 971           | 214   | 18,4  | 4,415,162     | Cuana, Cuene                                                                               | South East Atlantic Ocean  | Atlantic Ocean    |
| 16,5   | 16   | 5 | SDT | 45 | SDT_Ai  | 522,378    | -      | -      | -      | 23,5  | 1,926         | 798   | 40,7  | 21,234,868    | Ogoue, Samaga, Congo, Ntem, Nyong                                                          | South East Atlantic Ocean  | Atlantic Ocean    |
| 17,4   | 17   | 4 | NST | 44 | NST_Ai  | 2,420,011  | -      | -      | -      | 25,1  | 1,945,095,489 | 0     | 25,1  | 1,945,095,489 | Qouai, Camero, Comoe, Sassandra, Pra                                                       | South East Atlantic Ocean  | Atlantic Ocean    |
| 17,4   | 17   | 4 | NST | 44 | NST_Ai  | 773,542    | -      | -      | -      | 26,2  | 1,162         | 178   | 70,8  | 7,124,856     | Vofa, Bandama, Comoe, Sassandra, Pra                                                       | South East Atlantic Ocean  | Atlantic Ocean    |
| 18,5   | 18   | 5 | SDT | 45 | SDT_Ai  | 254,589    | -      | -      | -      | 25,0  | 2,537         | 1,448 | 47,8  | 12,176,287    | Cavally                                                                                    | North East Atlantic Ocean  | Atlantic Ocean    |
| 19,4   | 19   | 4 | NST | 44 | NST_Ai  | 1,086,727  | -      | -      | -      | 17,2  | 87,810,113    | 0     | 17,2  | 87,810,113    | Sereqet, Gambia                                                                            | North East Atlantic Ocean  | Atlantic Ocean    |
| 20,3   | 20   | 3 | NDR | 43 | NDR_Ai  | 2,170,829  | -      | -      | -      | 24,7  | 34            | 0     | 1,7   | 3,694,737     | Tamanasseli                                                                                | North East Atlantic Ocean  | Atlantic Ocean    |
| 21,3   | 21   | 3 | NDR | 43 | NDR_Ai  | 302,182    | -      | -      | -      | 17,8  | 29            | 0     | 60,5  | 21,898,374    | Sekou, Cuni Er Riba, Terafit, Sout                                                         | North East Atlantic Ocean  | Atlantic Ocean    |
| 401,2  | 401  | 2 | NML | 32 | NML_Ai  | 795,405    | -      | 0,2%   | 1,3%   | 11,5  | 736           | 276   | 98,7  | 78,485,147    | Loire, Doune, Seine, Tejo, Guadiana, Garonne, Guadalquivir, Dordogne                       | North East Atlantic Ocean  | Atlantic Ocean    |
| 402,1  | 402  | 1 | POL | 31 | POL_Ai  | 30,636     | -      | 15,2%  | 100,0% | 1,6   | 1,208         | 1,244 | 5,2   | 158,399       | Thyris, Orlava                                                                             | North East Atlantic Ocean  | Atlantic Ocean    |
| 402,2  | 402  | 2 | NML | 32 | NML_Ai  | 101,986    | -      | -      | -      | 7,9   | 1,153         | 201   | 13,3  | 31,427,268    | Severn, Shannon                                                                            | North East Atlantic Ocean  | Atlantic Ocean    |
| 402,3  | 403  | 2 | NML | 32 | NML_Ai  | 851,232    | -      | 7,5%   | 64,8%  | 6,5   | 819           | 404   | 199,4 | 169,787,968   | Rhine, Elbe, Gota, Glama, Weser, Meuse, Thames                                             | North East Atlantic Ocean  | Atlantic Ocean    |
| 404,2  | 404  | 2 | NML | 32 | NML_Ai  | 695,910    | -      | -      | -      | 11,2  | 213           | 0     | 85,5  | 69,209,133    | Wala, Odra, Neenana, Dravaga                                                               | North East Atlantic Ocean  | Atlantic Ocean    |
| 406,1  | 406  | 1 | POL | 31 | POL_Ai  | 482,335    | -      | 23,0%  | 100,0% | 0,1   | 588           | 290   | 30,0  | 3,873,545     | Kemijoki, Torniojoki, Angereham, Oulavnen                                                  | Baltic Sea                 | Atlantic Ocean    |
| 407,2  | 408  | 2 | NML | 32 | NML_Ai  | 440,531    | -      | -      | -      | 10,0  | 275           | 0     | 35,7  | 15,723,943    | Neva, Narva, Kymijoki, Luga                                                                | Baltic Sea                 | Atlantic Ocean    |
| 407,3  | 407  | 3 | POL | 31 | POL_Ai  | 201,923    | -      | 66,7%  | 100,0% | 1,1   | 112           | 7,5   | 1,5   | 148,645       | Trounheisen Fjord                                                                          | Arctic Ocean               | Arctic Ocean      |
| 408,1  | 408  | 1 | POL | 31 | POL_Ai  | 1,306,914  | -      | 38,7%  | 64,3%  | 2,0   | 542           | 314   | 3,2   | 15,723,943    | Neva, Narva, Kymijoki, Luga                                                                | Baltic Sea                 | Atlantic Ocean    |
| 409,1  | 409  | 1 | POL | 31 | POL_Ai  | 2,170,829  | -      | 85,0%  | 100,0% | 0,1   | 588           | 290   | 30,0  | 3,873,545     | Kemijoki, Torniojoki, Angereham, Oulavnen                                                  | Baltic Sea                 | Atlantic Ocean    |
| 410,2  | 410  | 2 | NML | 32 | NML_Ai  | 1,778,051  | 100,0% | 0,6%   | 16,9%  | 3,8   | 529           | 172   | 41,0  | 72,921,631    | Vojak, Kuma, Tenek, Sukak                                                                  | Arctic Ocean               | Arctic Ocean      |
| 411,2  | 411  | 2 | NML | 32 | NML_Ai  | 573,020    | -      | 0,0%   | 0,1%   | 7,3   | 634           | 91    | 55,4  | 31,765,057    | Don, Kuban                                                                                 | Black Sea + Azov           | Mediterranean Sea |
| 412,2  | 412  | 2 | NML | 32 | NML_Ai  | 1,513,458  | -      | 1,8%   | 64,4%  | 6,6   | 688           | 448   | 99,1  | 134,909,821   | Danube, Dniepr, Dniestr, Bug                                                               | Black Sea + Azov           | Mediterranean Sea |
| 413,2  | 413  | 2 | NML | 32 | NML_Ai  | 10,962     | -      | -      | -      | 11,0  | 635           | 196   | 11,0  | 1,286,107     | No important rivers                                                                        | Black Sea + Azov           | Mediterranean Sea |
| 414,2  | 414  | 2 | NML | 32 | NML_Ai  | 21,937     | -      | -      | -      | 11,6  | 631           | 207   | 11,6  | 18,262,496    | Evros, Strymon, Axios                                                                      | Mediterranean Sea          | Mediterranean Sea |
| 415,2  | 415  | 2 | NML | 32 | NML_Ai  | 67,662     | -      | -      | -      | 11,2  | 745           | 289   | 12,8  | 7,617,580     | No important rivers                                                                        | Mediterranean Sea          | Mediterranean Sea |
| 416,2  | 416  | 2 | NML | 32 | NML_Ai  | 256,306    | -      | 13,6%  | 21,3%  | 9,6   | 982           | 672   | 17,1  | 43,967,345    | Po                                                                                         | Mediterranean Sea          | Mediterranean Sea |
| 417,2  | 417  | 2 | NML | 32 | NML_Ai  | 59,276     | -      | -      | -      | 13,0  | 263           | 0     | 12,8  | 8,868,546     | No important rivers                                                                        | Mediterranean Sea          | Mediterranean Sea |
| 418,2  | 418  | 2 | NML | 32 | NML_Ai  | 343,449    | -      | 6,9%   | 11,4%  | 11,1  | 724           | 279   | 103,9 | 35,670,096    | Rhone, Ebro, Segura, Jucar                                                                 | Mediterranean Sea          | Mediterranean Sea |
| 801,5  | 801  | 5 | SDT | 25 | SDT_Sam | 38,773     | -      | -      | -      | 24,8  | 2,651         | 1,553 | 84,8  | 3,118,399     | No important rivers                                                                        | North East Pacific Ocean   | Pacific Ocean     |
| 802,4  | 802  | 4 | NST | 14 | NST_Nam | 95,414     | -      | -      | -      | 1,933 | 1,033         | 0     | 18,9  | 14,360,089    | No important rivers                                                                        | North East Pacific Ocean   | Pacific Ocean     |
| 803,4  | 803  | 4 | NST | 14 | NST_Nam | 23,341     | -      | -      | -      | 21,0  | 1,066         | 254   | 133,6 | 31,850,254    | Balsas                                                                                     | North East Pacific Ocean   | Pacific Ocean     |
| 804,4  | 804  | 4 | NST | 14 | NST_Nam | 289,499    | -      | -      | -      | 12,7  | 513           | 597   | 12,7  | 513,705       | Grande de Santiago                                                                         | Gulf of Mexico             | Pacific Ocean     |
| 805,3  | 805  | 3 | NDR | 13 | NDR_Nam | 1,038,731  | -      | 2,4%   | 4,0%   | 13,5  | 366           | 20    | 12,1  | 12,564,680    | Colorado (Arizona), Furiere                                                                | California Gulf            | Pacific Ocean     |
| 806,3  | 806  | 3 | NDR | 13 | NDR_Nam | 62,251     | -      | -      | -      | 18,2  | 197           | 0     | 12,4  | 775,084       | No important rivers                                                                        | North East Pacific Ocean   | Pacific Ocean     |
| 807,2  | 807  | 2 | NML | 12 | NML_Nam | 245,171    | -      | 2,0%   | 8,2%   | 12,1  | 599           | 93    | 23,3  | 23,621,386    | Sao Joaquin, Sacramento                                                                    | North East Pacific Ocean   | Pacific Ocean     |
| 808,2  | 808  | 2 | NML | 12 | NML_Nam | 836,069    | -      | 12,6%  | 29,0%  | 5,2   | 390           | 0     | 10,7  | 8,948,028     | Columbia, Klamath, Eel                                                                     | North East Pacific Ocean   | Pacific Ocean     |
| 809,2  | 809  | 2 | NML | 12 | NML_Nam | 1,403,618  | -      | 85,3%  | 98,8%  | 2,4   | 195           | 0     | 19,7  | 8,546,800     | Fraser, Skeena, Nass, Skegvi                                                               | North West Atlantic Ocean  | Pacific Ocean     |
| 810,1  | 810  | 1 | POL | 11 | POL_Ai  | 313,405    | -      | 73,9%  | 95,4%  | 2,3   | 828           | 980   | 2,0   | 618,870       | Copper, Stikine, Alsek, Taku                                                               | North East Pacific Ocean   | Pacific Ocean     |
| 811,1  | 811  | 1 | POL | 11 | POL_Ai  | 11,930     | -      | 25,2%  | 100,0% | 1,2   | 683           | 2,055 | 0,0   | 0             | No important rivers                                                                        | North East Pacific Ocean   | Pacific Ocean     |
| 812,1  | 812  | 1 | POL | 11 | POL_Ai  | 269,124    | -      | 28,9%  | 27,7%  | 6,1   | 291           | 0     | 1,1   | 2,595         | Kuskokwim, Nushagak                                                                        | Bering Sea                 | Arctic Ocean      |
| 813,1  | 813  | 1 | POL | 11 | POL_Ai  | 908,963    | -      | 88,3%  | 92,3%  | 7,0   | 326           | 238   | 0,1   | 133,635       | Yukon, Kuznir, Koyuk                                                                       | Bering Sea                 | Pacific Ocean     |
| 814,1  | 814  | 1 | POL | 11 | POL_Ai  | 153,482    | -      | -      | -      | 1,9   | 122           | 0     | 11,9  | 114,420       | Kobuk, Noatak                                                                              | Arctic Ocean               | Arctic Ocean      |
| 815,1  | 815  | 1 | POL | 11 | POL_Ai  | 2,252,418  | -      | 88,0%  | 91,4%  | 4,8   | 349           | 135   | 0,2   | 430,175       | MacKenzie, Peel, Colville, Athabasca                                                       | Arctic Ocean               | Arctic Ocean      |
| 816,1  | 816  | 1 | POL | 11 | POL_Ai  | 985,964    | -      | 96,7%  | 100,0% | -16,0 | 156           | 54    | 0,0   | 10,303        | Black, Coppermine, Burnside, Hayes (Arctic), Ellice                                        | Canadian Archipelago       | Arctic Ocean      |
| 817,1  | 817  | 1 | POL | 11 | POL_Ai  | 2,377,465  | -      | 95,1%  | 100,0% | -3,6  | 151           | 189   | 0,0   | 5,898,715     | Nelson, Churchill, Hudson Bay, Baker, Severn                                               | Hudson, Ungava, Fove Basin | Atlantic Ocean    |
| 818,1  | 818  | 1 | POL | 11 | POL_Ai  | 726,674    | -      | 54,4%  | 100,0% | -2,1  | 765           | 397   | 0,3   | 243,490       | Albany, Moose, La Grande, Notaway                                                          | Hudson, Ungava, Fove Basin | Atlantic Ocean    |
| 819,1  | 819  | 1 | POL | 11 | POL_Ai  | 187,278    | -      | 100,0% | 100,0% | -1,3  | 518           | 332   | 0,0   | 2,782         | Grande Riviere Baleine, Povungnituk, Petite Riviere Baleine, Imnuksauk, Kogatic, Nastopica | Hudson, Ungava, Fove Basin | Atlantic Ocean    |
| 820,1  | 820  | 1 | POL | 11 | POL_Ai  | 251,069    | -      | 100,0% | 100,0% | -2,1  | 135           | 0     | 0,0   | 997           | Koukdjuk, Middleth, Ping Rhy, Akudakak                                                     | Hudson, Ungava, Fove Basin | Atlantic Ocean    |
| 821,1  | 821  | 1 | POL | 11 | POL_Ai  | 432,348    | -      | 100,0% | 100,0% | -7,2  | 570           | 440   | 0,0   | 14,699        | Koksoak, Aux Feuilles, George, Arnaud                                                      | Hudson, Ungava, Fove Basin | Atlantic Ocean    |
| 822,1  | 822  | 1 | POL | 11 | POL_Ai  | 76,579     | -      | 100,0% | 100,0% | -11,5 | 419           | 267   | 0,0   | 40            | McKenzie                                                                                   | North West Atlantic Ocean  | Atlantic Ocean    |
| 823,1  | 823  | 1 | POL | 11 | POL_Ai  | 179,765    | -      | 98,5%  | 99,7%  | -16,3 | 217           | 74    | 0,0   | 302           | No important rivers                                                                        | Baffin Bay                 | Arctic Ocean      |
| 824,1  | 824  | 1 | POL | 11 | POL_Ai  | 256,240    | -      | 99,8%  | 100,0% | -4,3  | 673           | 249   | 0,0   | 34,215        | Churchill (Atlantic)                                                                       | North West Atlantic Ocean  | Atlantic Ocean    |
| 825,2  | 825  | 2 | NML | 12 | NML_Nam | 1,403,618  | -      | 12,6%  | 29,0%  | 5,2   | 390           | 0     | 10,7  | 8,948,028     | Columbia, Klamath, Eel                                                                     | North West Atlantic Ocean  | Pacific Ocean     |
| 826,2  | 826  | 2 | NML | 12 | NML_Nam | 93,696     | -      | 6,9%   | 99,8%  | 2,7   | 1,250         | 894   | 3,3   | 312,575       | No important rivers                                                                        | North West Atlantic Ocean  | Pacific Ocean     |
| 827,2  | 827  | 2 | NML | 12 | NML_Nam | 1,403,618  | -      | 12,6%  | 29,0%  | 5,2   | 390           | 0     | 10,7  | 8,948,028     | Columbia, Klamath, Eel                                                                     | North West Atlantic Ocean  | Pacific Ocean     |
| 828,4  | 828  | 4 | NST | 14 | NST_Nam | 42,242     | -      | -      | -      | 18,3  | 1,284         | 269   | 11,4  | 48,319,360    | Altamaha, Sattee, Savannah                                                                 | North West Atlantic Ocean  | Pacific Ocean     |
| 829,4  | 829  | 4 | NST | 14 | NST_Nam | 14,683     | -      | -      | -      | 22,6  | 1,409         | 269   | 36,2  | 5,316,373     | No important rivers                                                                        | Colombia-Venezuelan Basin  | Atlantic Ocean    |
| 830,4  | 830  | 4 | NST | 14 | NST_Nam | 1,787,8    | -      | -      | -      | 1,4   | 1,409         | 269   | 36,2  | 5,316,373     | No important rivers                                                                        | Colombia-Venezuelan Basin  | Atlantic Ocean    |
| 831,5  | 831  | 5 | SDT | 25 | SDT_Sam | 187,702    | -      | -      | -      | 23,9  | 2,567         | 1,361 | 44,3  | 8,319,128     | San Juan, Grande Matagorda, Coco                                                           | Colombia-Venezuelan Basin  | Atlantic Ocean    |
| 832,4  | 832  | 4 | NST | 14 | NST_Nam | 326,552    | -      | -      | -      | 23,2  | 1,742         | 615   | 22,8  | 20,521,524    | Usumacinta, Grigalia, Papaloapan                                                           | Colombia-Venezuelan Basin  | Atlantic Ocean    |
| 833,2  | 833  | 2 | NML | 12 | NML_Nam | 358,187    | -      | -      | -      | 17,9  | 683           | 34    | 23,5  | 8,107,727     | Bravo, Colorado (Texas), Nueces, Guadalupe                                                 | Gulf of Mexico             | Atlantic Ocean    |
| 834,2  | 834  | 2 | NML | 12 | NML_Nam | 1,038,268  | -      | 1,0%   | 0,9%   | 22,4% | 594           | 219   | 23,5  | 8,107,727     | Bravo, Colorado (Texas), Nueces, Guadalupe                                                 | Gulf of Mexico             | Atlantic Ocean    |
| 835,2  | 835  | 2 | NML | 12 | NML_Nam | 3,679,256  | -      | 0,8%   | 22,4%  | 0,8%  | 683           | 219   | 23,5  | 8,107,727     | Bravo, Colorado (Texas), Nueces, Guadalupe                                                 | Gulf of Mexico             | Atlantic Ocean    |
| 1101,5 | 1101 | 5 | SDT | 25 | SDT_Sam | 1,038,268  | -      | -      | -      | 1,933 | 1,033         | 0     | 18,9  | 14,360,089    | No important rivers                                                                        | North West Atlantic Ocean  | Pacific Ocean     |
| 1102,4 | 1102 | 4 | NST | 14 | NST_Nam | 23,341     | -      | -      | -      | 21,0  | 1,066         | 254   |       |               |                                                                                            |                            |                   |
